# Supplementary material for: Cross-sectional analysis of primary care clinics’ policies, practices, and availability of patient support services during the COVID-19 pandemic
Source: PubMed Central journal article supplement (PMC10916250; doi:10.1186/s12913-024-10660-6), 2024-03-05
Supplement: 12913_2024_10660_MOESM2_ESM.pdf [file 12913_2024_10660_MOESM2_ESM.pdf]

**Patient Access to Health Care**

1. What factors seem to most impact your patients' ability to receive timely access to health care? **Please mark all that apply.**

- \_\_\_\_\_ Clinic hours (not open in evening, weekends, etc.)
- \_\_\_\_\_ Finances (insurance coverage, copayments, etc.)
- \_\_\_\_\_ Language barriers
- \_\_\_\_\_ Patients can't afford to take time off from work
- \_\_\_\_\_ Patients can't get an appointment soon enough (not enough providers)
- \_\_\_\_\_ Patients forget to schedule (annual visit, follow-ups, etc.)
- \_\_\_\_\_ Patients lack dependent care (childcare, eldercare, etc.)
- \_\_\_\_\_ Transportation
- \_\_\_\_\_ Wait times in office to see provider
- \_\_\_\_\_ Other (please specify): \_\_\_\_\_

**Patient Resources**

2. Please indicate whether any of the following services are available on-site or through a community partner:

|                                          | <b>On-site</b>           | <b>Partner</b>           | <b>Not Available</b>     |
|------------------------------------------|--------------------------|--------------------------|--------------------------|
| a. Patient navigator or care coordinator | <input type="checkbox"/> | <input type="checkbox"/> | <input type="checkbox"/> |
| b. Telehealth options                    | <input type="checkbox"/> | <input type="checkbox"/> | <input type="checkbox"/> |

If *telehealth* is available, please describe: \_\_\_\_\_  
 \_\_\_\_\_  
 \_\_\_\_\_

|                                                                                                    |                          |                          |                          |
|----------------------------------------------------------------------------------------------------|--------------------------|--------------------------|--------------------------|
| c. Social support                                                                                  |                          |                          |                          |
| i. Social Work                                                                                     | <input type="checkbox"/> | <input type="checkbox"/> | <input type="checkbox"/> |
| ii. Legal Aid                                                                                      | <input type="checkbox"/> | <input type="checkbox"/> | <input type="checkbox"/> |
| iii. Assistance applying for Medicaid, Medicare, Supplemental Nutritional Assistance Program, etc. | <input type="checkbox"/> | <input type="checkbox"/> | <input type="checkbox"/> |
| iv. Transportation services                                                                        | <input type="checkbox"/> | <input type="checkbox"/> | <input type="checkbox"/> |
| v. Dependent care services (child, elder, etc.)                                                    | <input type="checkbox"/> | <input type="checkbox"/> | <input type="checkbox"/> |

**Policies & Procedures**

3. Does your practice have a policy for late arrivals?  Yes  No

a. If yes, please explain: \_\_\_\_\_  
 \_\_\_\_\_  
 \_\_\_\_\_

Patient Barriers to Accessing Health Care: Nebraska Primary Care Providers' Perspectives

4. Does your practice have a policy for missed appointments?  Yes  No

a. If yes, please explain: \_\_\_\_\_  
\_\_\_\_\_  
\_\_\_\_\_

5. For your clinic, how much are missed appointments a problem?

Not at all                       Slightly                       Somewhat                       Very much

6. Please indicate which, if any, of the following procedures or practices are used to reduce missed appointments:

a. Overbooking to reduce office wait times  Yes  No

b. Set-aside walk-in appointment slots  Yes  No

c. Increased provider capacity within the past 2 years  Yes  No

d. Behavioral engagement strategy  
    Motivational interviewing  Yes  No

    Contingency management  Yes  No

e. Scheduling reminders  
    Telephone (voice message)  Yes  No

    Text  Yes  No

    Email  Yes  No

    Mail (postcard, letter)  Yes  No

f. Appointment reminders  
    Telephone (voice message)  Yes  No

    Text  Yes  No

    Email  Yes  No

    Mail (postcard, letter)  Yes  No

g. Streamlined admissions/check-in  Yes  No

h. Welcoming environment  Yes  No

i. Extended hours  
    Evening hours  Yes  No

    Weekend  Yes  No

j. Fee charged to patients for  
    Late arrival  Yes  No

    Late cancellation (i.e., less than 24 hours)  Yes  No

    No-show/missed appointment  Yes  No

k. Dropped from service after missed appointments  Yes  No

    If yes, specify number of missed appointments \_\_\_\_\_

**2019 & 2020 Clinic Characteristics**

We want to compare clinic usage before and during the COVID-19 pandemic. For the following questions, please provide data for **2019** and for **2020 (January 1-September 30, 2020)**. Please indicate whether data provided are an estimate rather than exact numbers (based on electronic medical records, billing, or another method of regular tracking).

|                                                                                                                                                                          | Yes                      | No                       |                                    |
|--------------------------------------------------------------------------------------------------------------------------------------------------------------------------|--------------------------|--------------------------|------------------------------------|
| 7. Does your clinic utilize Electronic Medical Records (EMR)?                                                                                                            | <input type="checkbox"/> | <input type="checkbox"/> |                                    |
| a. If yes, is the EMR used to verify patient status (up-to-date, due, past due) for:                                                                                     |                          |                          |                                    |
| i. vaccines?                                                                                                                                                             | <input type="checkbox"/> | <input type="checkbox"/> |                                    |
| ii. cancer screening?                                                                                                                                                    | <input type="checkbox"/> | <input type="checkbox"/> |                                    |
|                                                                                                                                                                          | <b>2019</b>              | <b>2020</b>              | <b>Mark if this is an estimate</b> |
| 8. How many patients were seen by your practice?                                                                                                                         | _____                    | _____                    | <input type="checkbox"/>           |
| 9. <b>Percent</b> of patients by insurance status:                                                                                                                       |                          |                          |                                    |
| a. Medicaid                                                                                                                                                              | _____                    | _____                    | <input type="checkbox"/>           |
| b. Medicare (any type)                                                                                                                                                   | _____                    | _____                    | <input type="checkbox"/>           |
| c. Private insurance                                                                                                                                                     | _____                    | _____                    | <input type="checkbox"/>           |
| d. Uninsured or self-pay                                                                                                                                                 | _____                    | _____                    | <input type="checkbox"/>           |
| 10. Does your facility routinely track (e.g., as Quality Control or Quality Improvement) patient compliance with recommended cancer screening?                           | <input type="checkbox"/> | <input type="checkbox"/> |                                    |
| a. If yes, what <b>percent</b> of your patients were up-to-date for the following screenings:                                                                            |                          |                          | <b>Mark if this is an estimate</b> |
| i. <b>Colon</b> (% adults 50-75 years old who had FOBT or FIT in past year, sigmoidoscopy in past 5 years, or colonoscopy in past 10 year):                              | _____                    | _____                    | <input type="checkbox"/>           |
| ii. <b>Breast</b> (% females 50-74 with mammogram in past 2 years)                                                                                                       | _____                    | _____                    | <input type="checkbox"/>           |
| iii. <b>Cervical</b> (% females 21-65 without hysterectomy who had Pap smear in past 3 years, or women age 30-65 who had Pap smear and HPV test within the past 5 years) | _____                    | _____                    | <input type="checkbox"/>           |

Patient Barriers to Accessing Health Care: Nebraska Primary Care Providers' Perspectives

11. Would your organization like to be included in collaborative intervention research to improve patient health outcomes? Yes  No

**COVID-19 Clinic Impacts on Health Care Access**

- | <b>Compared to 2019, during March-May 2020...</b> | <b>Decreased</b>         | <b>Unchanged</b>         | <b>Increased</b>         |
|---------------------------------------------------|--------------------------|--------------------------|--------------------------|
| 12. the number of patients seen ...               | <input type="checkbox"/> | <input type="checkbox"/> | <input type="checkbox"/> |
| 13. our operating hours ...                       | <input type="checkbox"/> | <input type="checkbox"/> | <input type="checkbox"/> |
| 14. our staff availability ...                    | <input type="checkbox"/> | <input type="checkbox"/> | <input type="checkbox"/> |
| 15. our telehealth services ...                   | <input type="checkbox"/> | <input type="checkbox"/> | <input type="checkbox"/> |
| <b>Compared to 2019, since June 2020...</b>       |                          |                          |                          |
| 16. the number of patients seen ...               | <input type="checkbox"/> | <input type="checkbox"/> | <input type="checkbox"/> |
| 17. our operating hours ...                       | <input type="checkbox"/> | <input type="checkbox"/> | <input type="checkbox"/> |
| 18. our staff availability ...                    | <input type="checkbox"/> | <input type="checkbox"/> | <input type="checkbox"/> |
| 19. our telehealth services ...                   | <input type="checkbox"/> | <input type="checkbox"/> | <input type="checkbox"/> |

20. To what extent has COVID-19 impacted your organization's ability to provide health services?

- No impact       Slight impact       Moderate impact       Major impact

21. **If moderate or major impact**, please describe: \_\_\_\_\_  
\_\_\_\_\_  
\_\_\_\_\_

22. How satisfied are you with your patients' ability to receive timely COVID testing?

- Very satisfied     Somewhat satisfied     Neither satisfied nor dissatisfied     Somewhat dissatisfied     Very dissatisfied

23. Please share with us anything else you would like us to know about the impact of COVID-19 on your patients or practice. \_\_\_\_\_  
\_\_\_\_\_  
\_\_\_\_\_

*Please provide information about the person(s) completing this form.*

24. Job title: \_\_\_\_\_

25. Length of time at this organization: \_\_\_\_\_ (years)
